# Supplementary material
Source: PubMed Central journal article supplement (PMC3135813)
Supplement: mmc1.pdf [file mmc1.pdf]

**The American Journal of Human Genetics Volume 89**

**Supplemental Data**

**Deficiency of the Cytoskeletal Protein SPECC1L**

**Leads to Oblique Facial Clefting**

**Irfan Saadi, Fowzan S. Alkuraya, Stephen S. Gisselbrecht, Wolfram Goessling, Resy Cavallesco, Annick Turbe-Doan, Aline L. Petrin, James Harris, Ursela Siddiqui, Arthur W. Grix, Jr., Hanne D. Hove, Philippe Leboulch, Thomas W. Glover, Cynthia C. Morton, Antonio Richieri-Costa, Jeffrey C. Murray, Robert P. Erickson, and Richard L. Maas**

**Fig. S1. *Specc11* is expressed in the developing facial primordia, eyes and limbs.** Whole mount (a, b) and section (a', b') *in situ* hybridizations with *Specc11* probe at E9.5 (a, a') and E10.5 (b, b'). (c, c') *Specc11* immunohistochemistry at E10.5. Arrow: eye expression; arrowhead: limb expression; brackets: branchial arch (ba) expression.

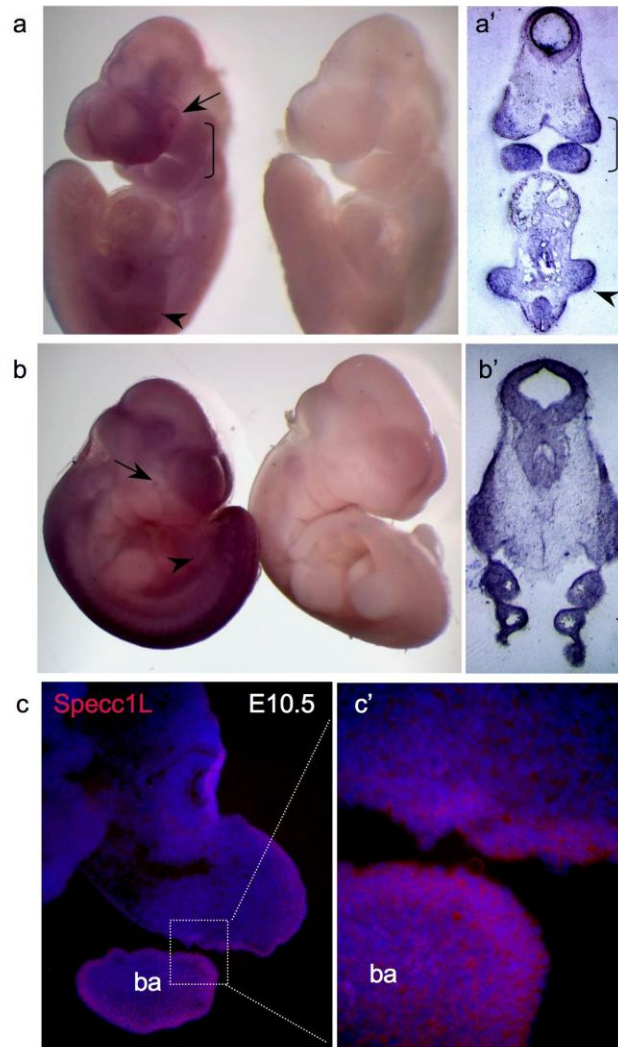

**Fig. S2. Phylogenetic tree of SPECC1L orthologs in *Drosophila* and zebrafish.** The phylogenetic tree was generated using the constrained-based multiple alignment tool (COBALT) available through NCBI. The protein sequences used were NP\_569848.2 (*Drosophila* CG13366), NP\_56145.2 (*SPECC1L*), ENSDARP00000047142 (zebrafish chr. 5 homolog), NP\_001034905.1 (zebrafish chr. 8 homolog), and ENSDARP00000061911 (zebrafish chr. 21 homolog). Compared to human *SPECC1L* protein, the *Drosophila* ortholog is 54% similar, the zebrafish chr. 5 homolog is 55% similar, while the chr. 8 and 21 homologs are 75% similar.

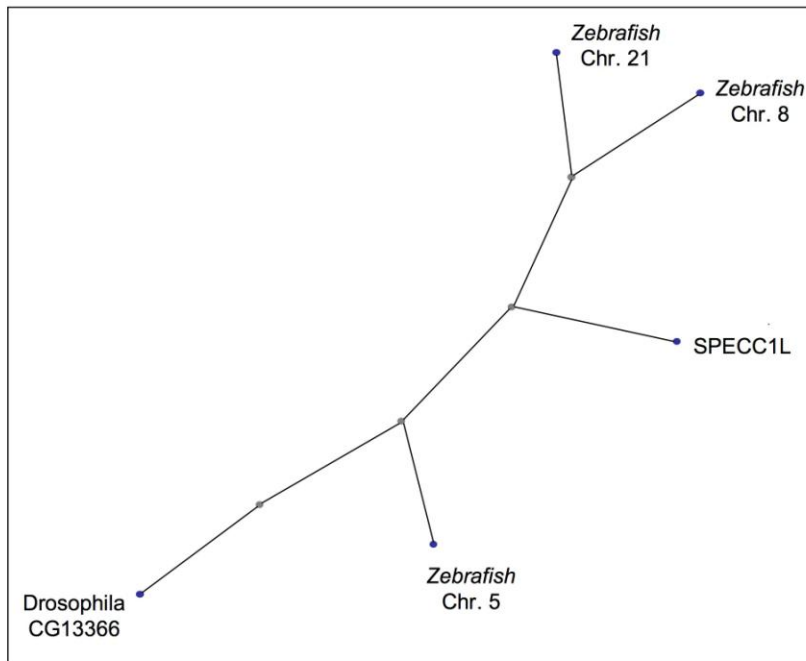

**Fig. S3. Nocodazole prevents stabilization of microtubules following Specc11-GFP expression.** Specc11-GFP expression shows stabilized microtubules (a,b; left panels), which are sensitive to nocodazole treatment (a, right panel) and are specifically recognized by the  $\alpha$ -SPECC1L antibody (b, right panel).

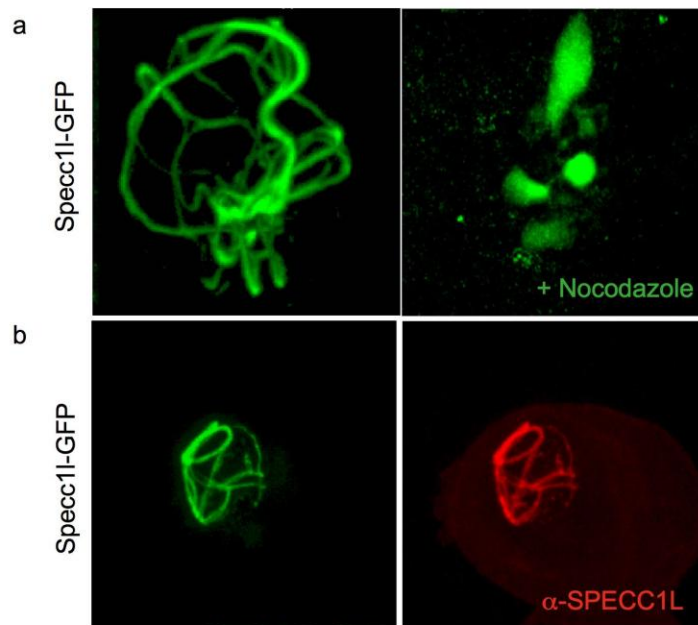

**Fig. S4. Validation of *SPECC1L* knockdown in 293T and U2OS clonal cells.** (a) *SPECC1L* knockdown in 293T cells (C1-1, B8-2), compared to control knockdown cells (GFP\_RNAi), is confirmed by Western blot analysis using the  $\alpha$ -*SPECC1L* antibody. *SPECC1L* protein is detected at approximately 120 kDa. (b) qRT-PCR data showing percent *SPECC1L* transcripts in clonal cell lines (uB8-5, uB8-9, uC1-5, uC1-9) compared to control GFP knockdown cells (uGFPi). The 293T control (293T-GFPi) and knockdown clones (B8-2, C1-1) are shown for comparison.

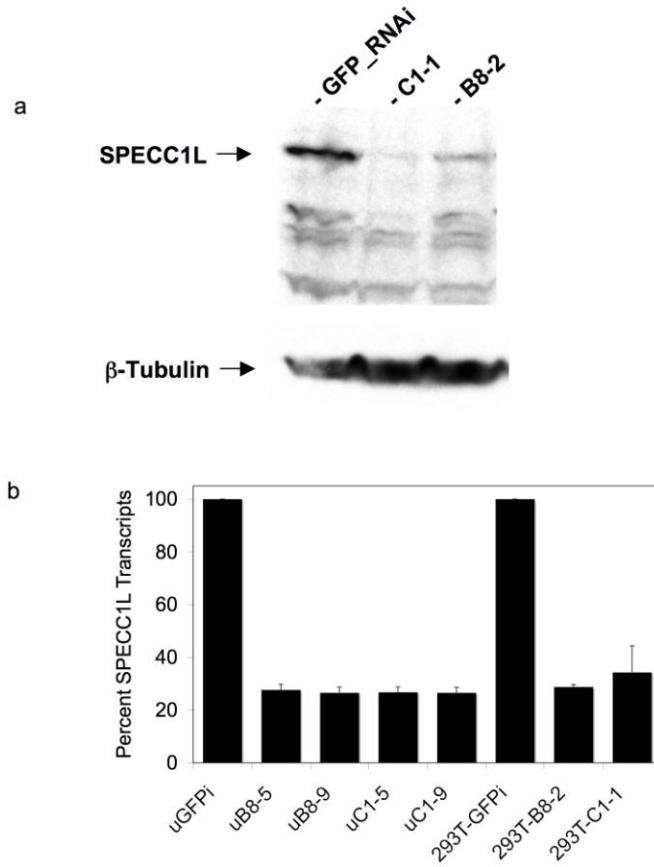

**Table S1. Primer sequences used in RT-PCR, *in situ* probe and morpholino synthesis**

| <b>Primer Name</b>            | <b>Experiment</b>            | <b>Sequence</b>                                     |
|-------------------------------|------------------------------|-----------------------------------------------------|
| <i>SPECC1L</i> Exon 8 Fwd     | RT-PCR                       | 5'-TCTGCCGAATGGCGGCAGTTT-3'                         |
| <i>SPECC1L</i> Exon 14 Rev    | RT-PCR                       | 5'-CACCAC TTCAGCAAGGCGTTCCT-3'                      |
| <i>Specc1l</i> probe1 SP6 Fwd | <i>In situ</i> hybridization | 5'-GCTATTTAGGTGACACTATAGTgtgatcctcatggc agtgt-3'    |
| <i>Specc1l</i> probe1 T7 Rev  | <i>In situ</i> hybridization | 5'-TTGTAATACGACTCACTATAGGgaaggta gctggcccttttgt-3'  |
| <i>Specc1l</i> probe2 SP6 Fwd | <i>In situ</i> hybridization | 5'-GCTATTTAGGTGACACTATAGc caggaga agtggctctacg-3'   |
| <i>Specc1l</i> probe2 T7 Rev  | <i>In situ</i> hybridization | 5'-TTGTAATACGACTCACTATAGGggc ctc agtgaaggc aaata-3' |
| <i>Specc1l</i> -chr5          | Morpholino                   | 5'-ACTTCTACTTCACTGCATACCTGCT-3'                     |
| <i>Specc1l</i> -chr8          | Morpholino                   | 5'-GTAGTTATTTCTAACCTCAGGCAGT-3'                     |
| <i>Specc1l</i> -chr21         | Morpholino                   | 5'-ATTTTCTGAATATGTTTCACCTTGC-3'                     |

Note: SP6 and T7 sequences are in uppercase for *in situ* hybridization probe primers.
